# Supplementary material for: Reconstructing double-stranded DNA fragments on a single-molecule level reveals patterns of degradation in ancient samples
Source: PubMed Central journal article supplement — Genome Res. 2020 Oct;30(10):1449–57. doi: 10.1101/gr.263863.120 (PMC7605269; doi:10.1101/gr.263863.120), 2020-10
Supplement: supp_gr.263863.120_Supplemental_Material.pdf [file supp_gr.263863.120_Supplemental_Material.pdf]

# Supplemental Material

## Reconstructing double-stranded DNA fragments on a single molecule level reveals patterns of degradation in ancient samples

Lukas Bokelmann, Isabelle Glocke and Matthias Meyer

### Table of Contents

|                                                                                                                                                                                                                                                                                                                                                |    |
|------------------------------------------------------------------------------------------------------------------------------------------------------------------------------------------------------------------------------------------------------------------------------------------------------------------------------------------------|----|
| <i>Figure S1: Background corrected reference base composition (sequence logo plots) and substitution frequencies in sequences from Vindija 33.19 in different structural contexts as indicated by schematic representations.</i>                                                                                                               | 2  |
| <i>Figure S2: Background corrected C-to-T substitution frequencies and sequence logo plot of the reference base composition around putative 1-nt gaps in Neanderthal DNA fragments.</i>                                                                                                                                                        | 3  |
| <i>Figure S3: Background corrected C-to-T substitution frequencies and sequence logo plot of the reference base composition around Neanderthal molecules with 20-nt 5' overhangs.</i>                                                                                                                                                          | 4  |
| <i>Figure S4: Uncorrected C-to-T substitution frequencies and sequence logo plot of the reference base composition around Neanderthal molecules with 20-nt 3' overhangs.</i>                                                                                                                                                                   | 5  |
| <i>Figure S5: Uncorrected C-to-T (black line) and CpG-to-TpG (green dashed line) substitution frequencies in sequences from Vindija 33.19 in different structural contexts as indicated by schematic representations.</i>                                                                                                                      | 6  |
| <i>Figure S6: Non-C-to-T substitutions observed in all sequences vs. sequences located in 1-nt 5' or 3' overhangs in the Vindija 33.19 library.</i>                                                                                                                                                                                            | 7  |
| <i>Figure S7: Reconstruction of double-stranded DNA fragments depending on sequencing depth in a Neanderthal library (A18947, Vindija 33.19).</i>                                                                                                                                                                                              | 8  |
| <i>Figure S8: C-to-T substitution frequency in 1-nt 5' overhangs vs. age in libraries from different Neanderthal specimens (N = 6).</i>                                                                                                                                                                                                        | 9  |
| <i>Figure S9: C-to-T substitution frequency in 5' blunt ends vs. age in libraries from different Neanderthal specimens (N = 6).</i>                                                                                                                                                                                                            | 10 |
| <i>Figure S10: Reference base composition in 1-nt 5' overhangs vs. age in libraries from different Neanderthal specimens (N = 6).</i>                                                                                                                                                                                                          | 11 |
| <i>Figure S11: Background corrected C-to-T (black line) and CpG-to-TpG (green dashed line) substitution frequencies in sequences combined from 5 Neanderthal specimens (Hohlenstein-Stadel, Les Cottés Z4-1514, Scladina I-4A, Spy 94a and Sima de los Huesos) in different structural contexts as indicated by schematic representations.</i> | 12 |
| <i>Figure S12: Identification of sequences from DNA strands originating from the same double-stranded DNA molecules in a library constructed with the SRSLY library preparation method from cfDNA isolated from blood plasma.</i>                                                                                                              | 13 |
| <i>Figure S13: Sequence logo plots of the reference base composition around molecule ends of a library constructed with the SRSLY library preparation protocol from cfDNA isolated from blood plasma.</i>                                                                                                                                      | 14 |
| <i>Table S1: Sequencing summary statistics for the Vindija 33.19 Neanderthal DNA library.</i>                                                                                                                                                                                                                                                  | 15 |
| <i>Table S2: Number of sequences inferred to be located in a 1-nt 5'-overhang in sequence data from different Neanderthal specimens, as well as in the control data set down-sampled to an equal number of aligned sequences.</i>                                                                                                              | 15 |
| <i>Table S3: Nucleotide substitution frequencies at the 5' terminus (position 0) and the penultimate position (position 1) of sequences from Vindija 33.19 in different structural contexts.</i>                                                                                                                                               | 16 |
| <i>Table S4: Nucleotide substitution frequencies at the 3' terminus (position 0) and the penultimate position (position -1) of sequences from Vindija 33.19 in different structural contexts.</i>                                                                                                                                              | 16 |
| <i>Table S5: Number of sequences inferred to be located in different contexts in previously published sequence data from cfDNA isolated from blood plasma (Troll et al. 2019), as well as in the control data down-sampled to an equal number of aligned sequences.</i>                                                                        | 16 |

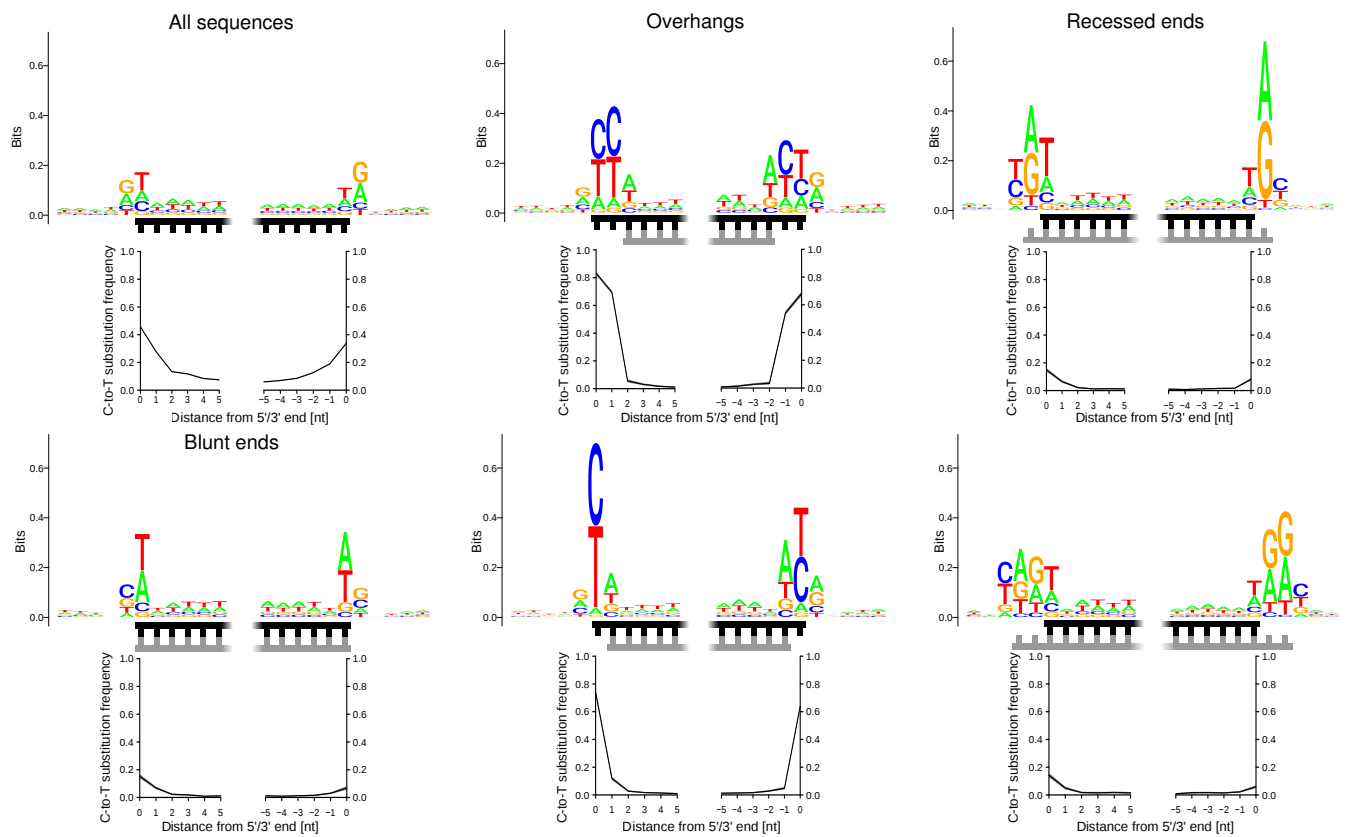

**Fig. S1.** Background corrected reference base composition (sequence logo plots) and substitution frequencies in sequences from Vindija 33.19 in different structural contexts as indicated by schematic representations.

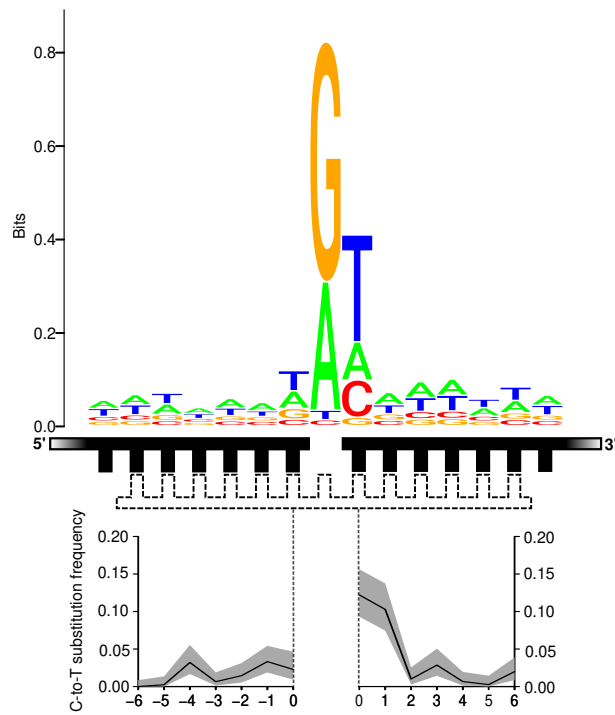

**Fig. S2.** Background corrected C-to-T substitution frequencies and sequence logo plot of the reference base composition around putative 1-nt gaps in Neanderthal DNA fragments. The strands used for calculating reference base compositions and substitution frequencies are marked black in the schematic drawing, the complementary strand that was putatively present in white. The grey area surrounding the C-to-T substitution frequencies denotes the 95% binomial confidence interval.

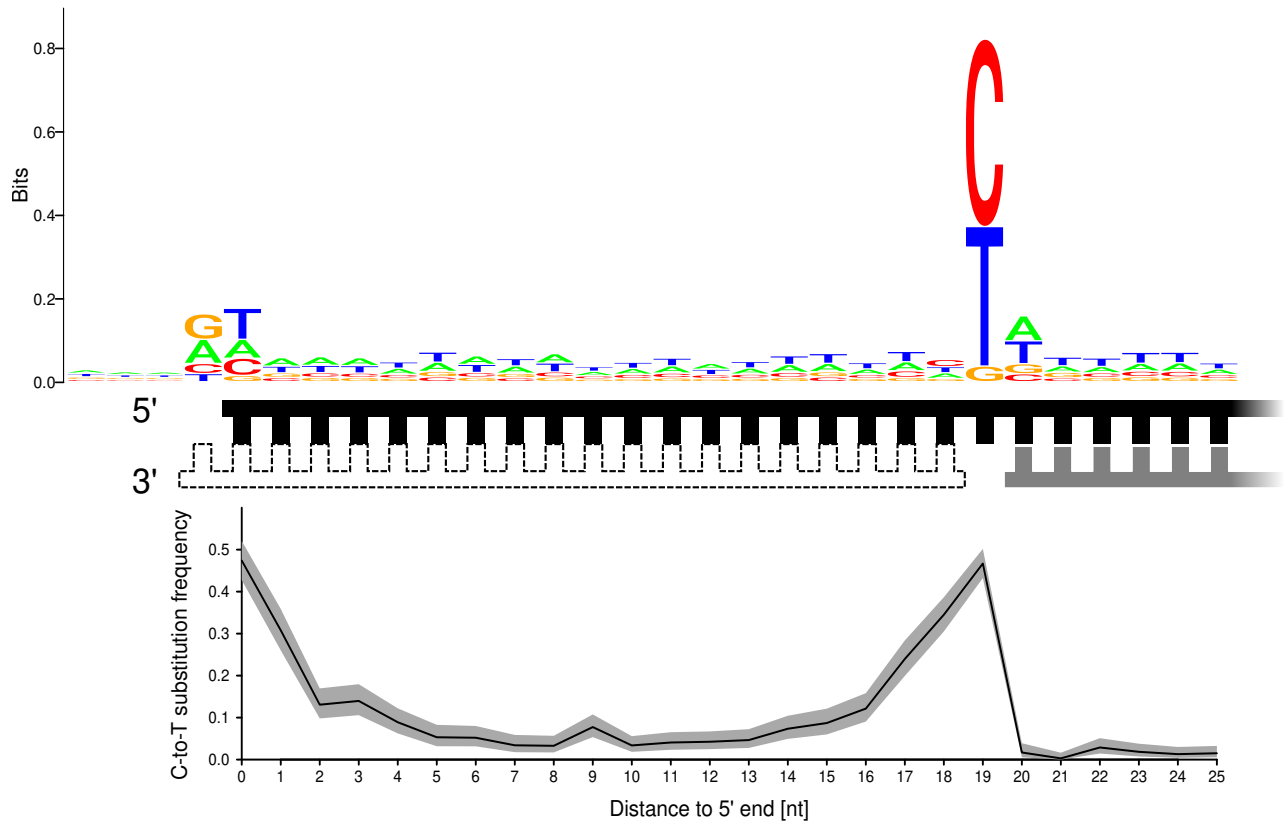

**Fig. S3.** Background corrected C-to-T substitution frequencies and sequence logo plot of the reference base composition around Neanderthal molecules with 20-nt 5' overhangs. A schematic representation of the alignments shows the strand used for calculating reference base composition and substitution frequencies (marked in black), the identified complementary strand (marked in grey) and a second complementary strand of unknown length that was putatively present (white fill). Note that the size of the gap is unknown. The grey area surrounding the C-to-T substitution frequencies denotes the 95% binomial confidence interval.

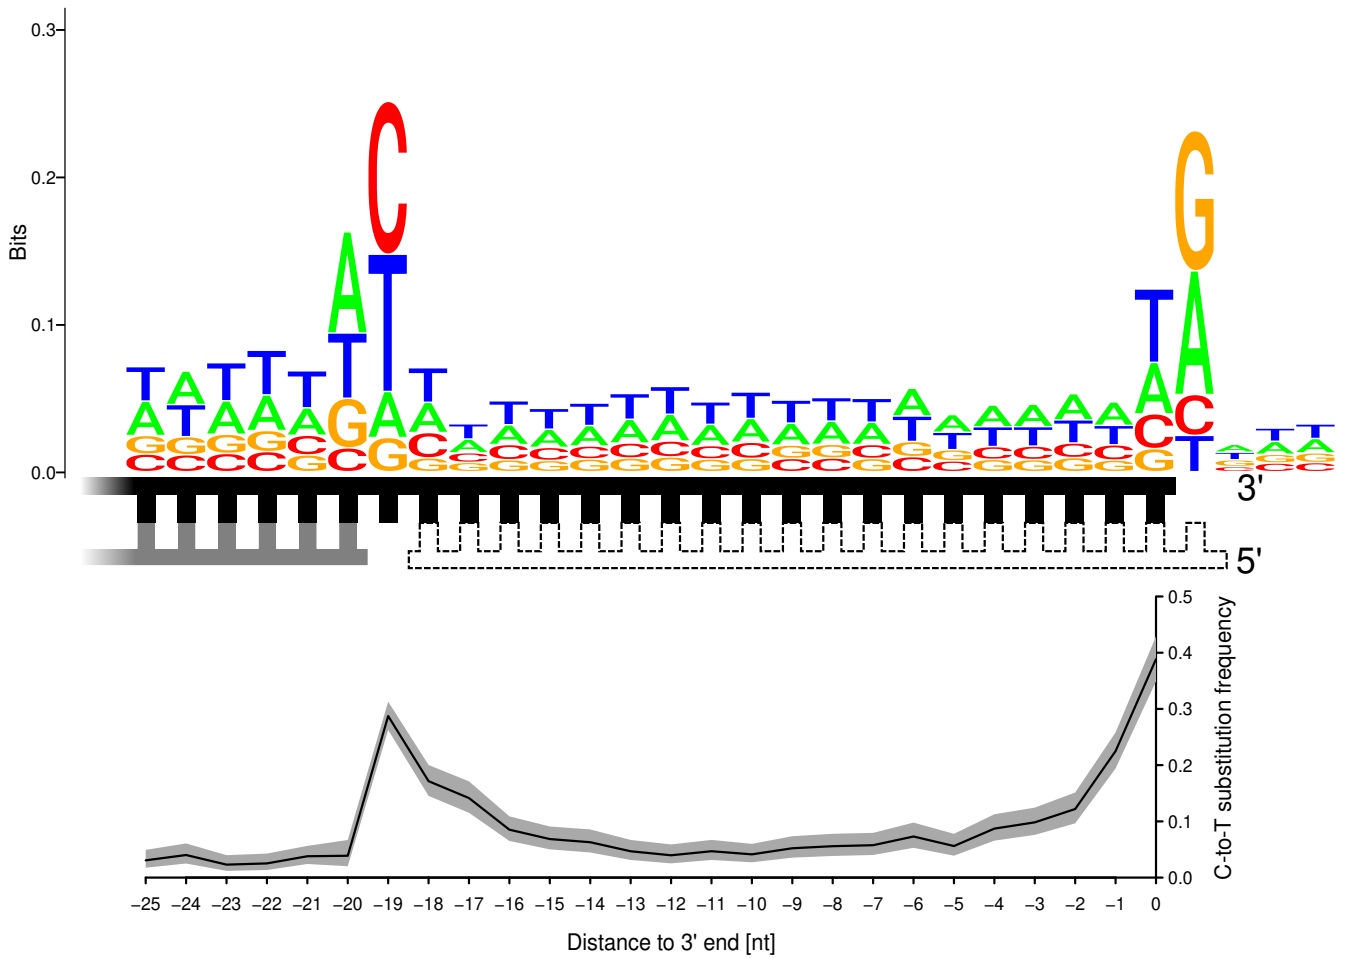

**Fig. S4.** Uncorrected C-to-T substitution frequencies and sequence logo plot of the reference base composition around Neanderthal molecules with 20-nt 3' overhangs. A schematic representation of the alignments shows the strand used for calculating reference base composition and substitution frequencies (marked in black), the identified complementary strand (marked in grey) and a second complementary strand of unknown length that was putatively present (white fill). Note that the size of the gap is unknown. The grey area surrounding the C-to-T substitution frequencies denotes the 95% binomial confidence interval.

- - - - CpG-to-TpG substitutions  
 — C-to-T substitutions

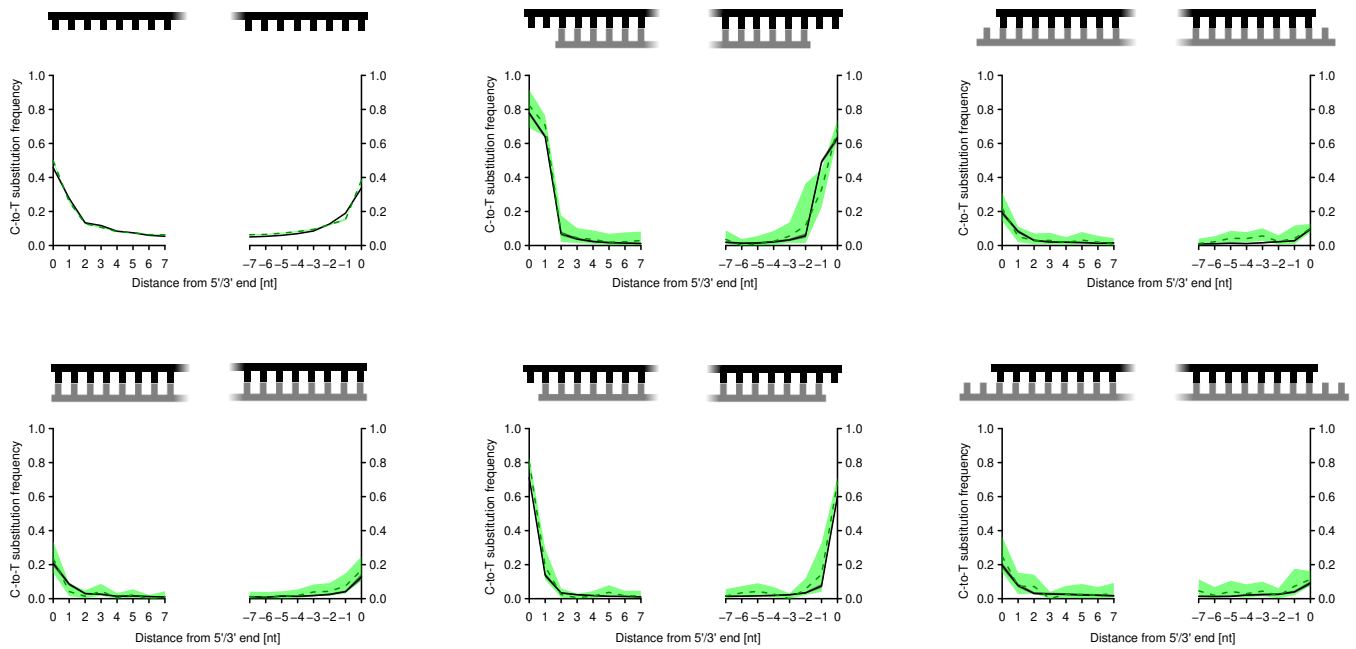

**Fig. S5.** Uncorrected C-to-T (black line) and CpG-to-TpG (green dashed line) substitution frequencies in sequences from Vindija 33.19 in different structural contexts as indicated by schematic representations. 95% binomial confidence intervals are indicated by shadings around the lines.

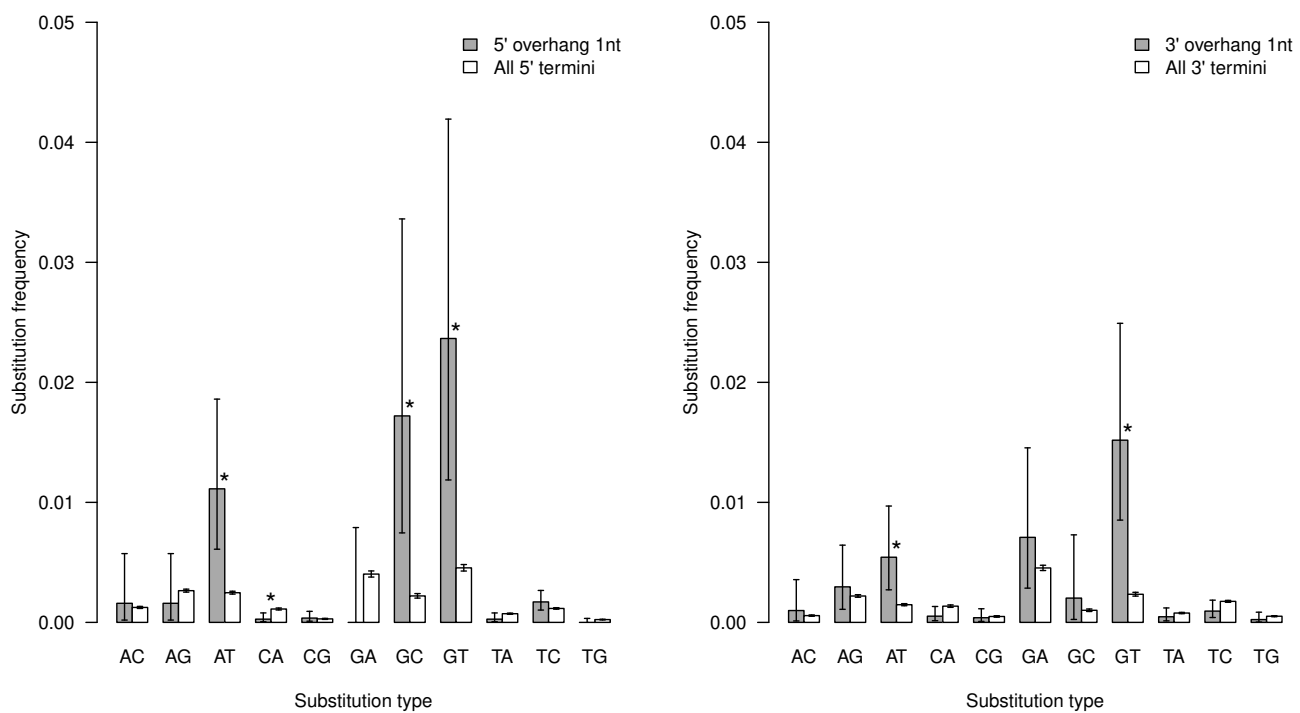

**Fig. S6.** Non-C-to-T substitutions observed in all sequences vs. sequences located in 1-nt 5' or 3' overhangs in the Vindija 33.19 library. Error bars indicated 95% binomial confidence intervals. Substitutions that are significantly more abundant in the respective overhang are indicated by an asterisk together with the p-value (two-tailed Fisher's test including Bonferroni correction for multiple testing (N = 11), p-values < 0.05).

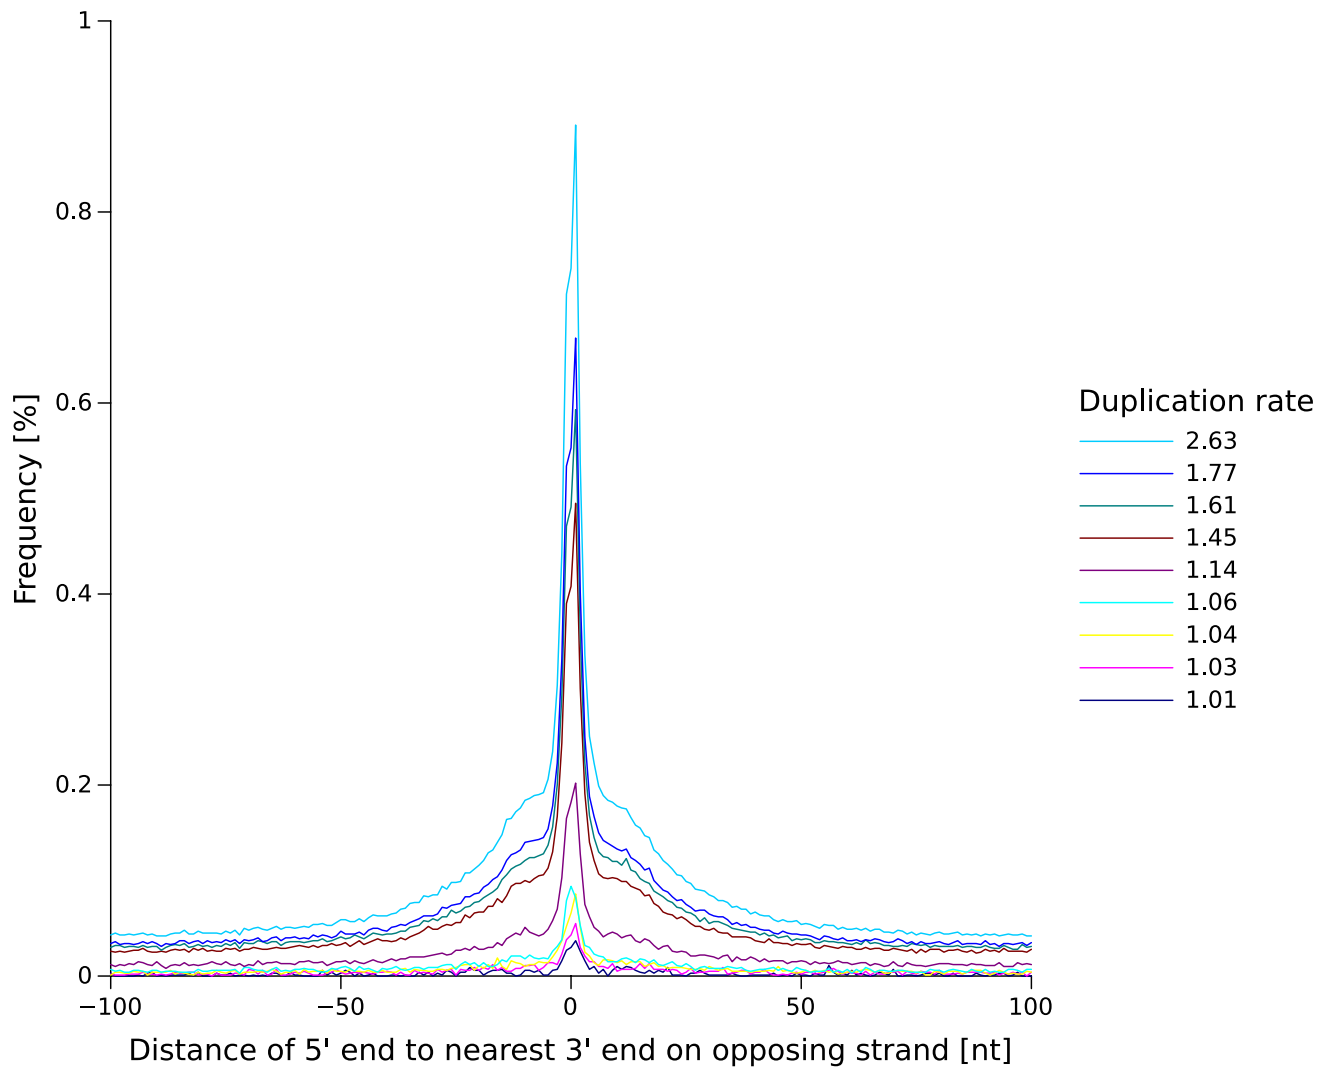

**Fig. S7.** Reconstruction of double-stranded DNA fragments depending on sequencing depth in a Neanderthal library (A18947, Vindija 33.19). Sequences from the Vindija 33.19 library were randomly subsampled to a fraction of the full dataset and the distribution of distances computed between the 5' end of each sequence and the nearest 3' end on the opposing strand. The duplication rate denotes the average number of observations for each unique hominin DNA sequence.



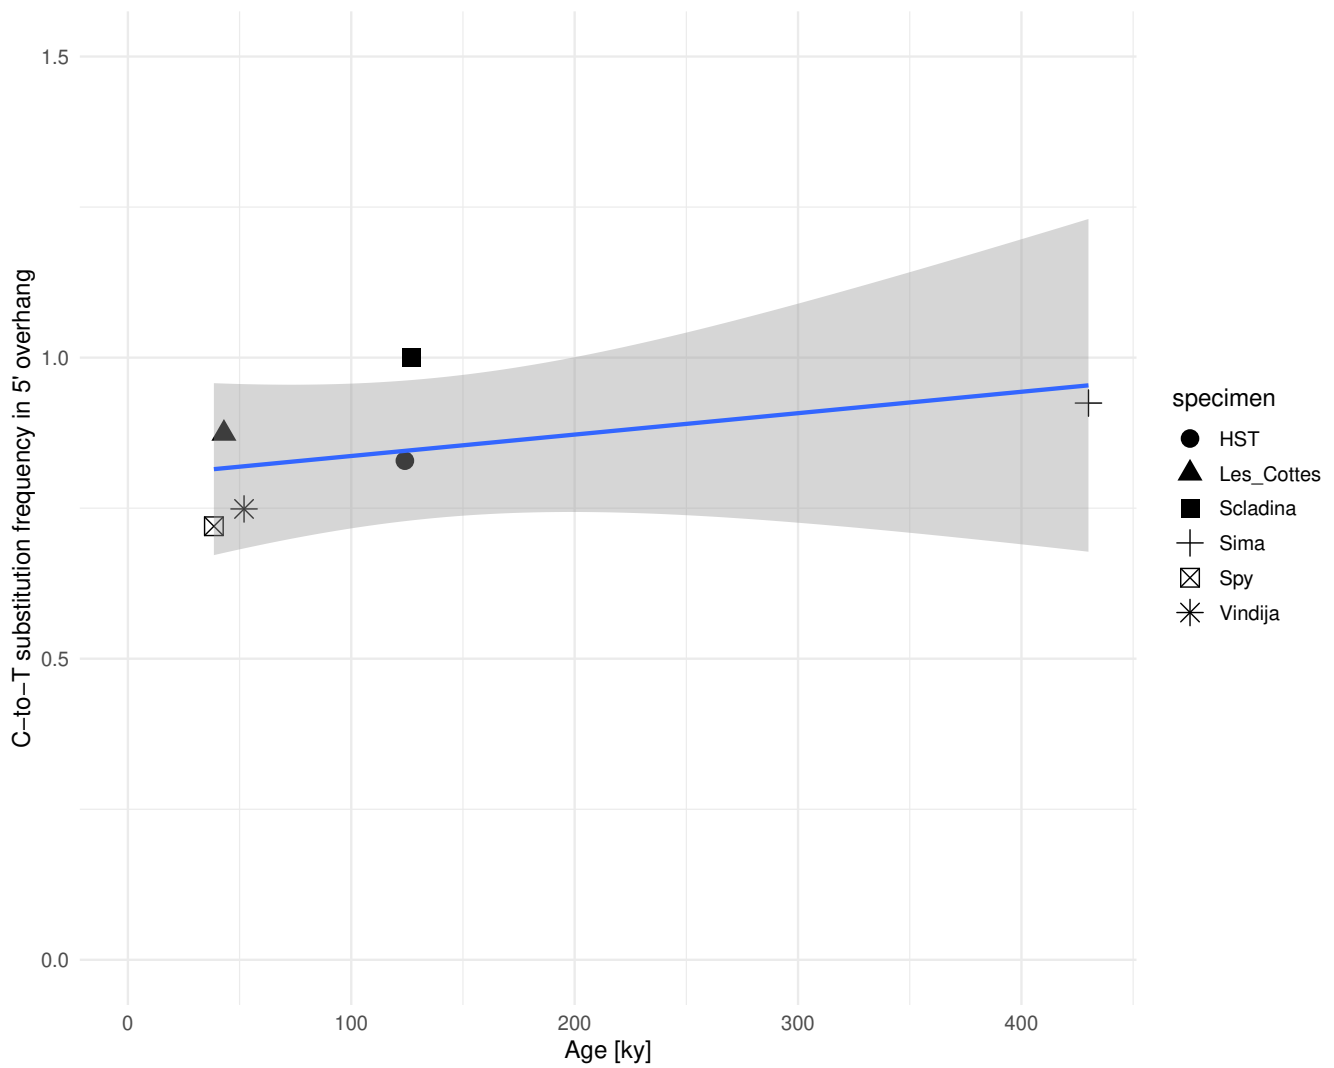

**Fig. S8.** C-to-T substitution frequency in 1-nt 5' overhangs vs. age in libraries from different Neanderthal specimens (N = 6). As some libraries show substantial levels of human DNA contamination, the analysis was restricted to putatively endogenous, deaminated fragments by requiring a C-to-T substitution at the 3' end of sequences. Background noise was subtracted using the signal/noise ratio determined via comparison to a modern control sample (see Table S1). For specimens for which more than one library were available, the library producing the largest number of DNA fragments with an inferred 1-nt 5' overhang was chosen. No significant correlation between deamination and sample age was found (one-tailed F-statistic linear regression on 1 and 4 degrees of freedom: 1.343, p-value: 0.31 (R2: 0.2514)).

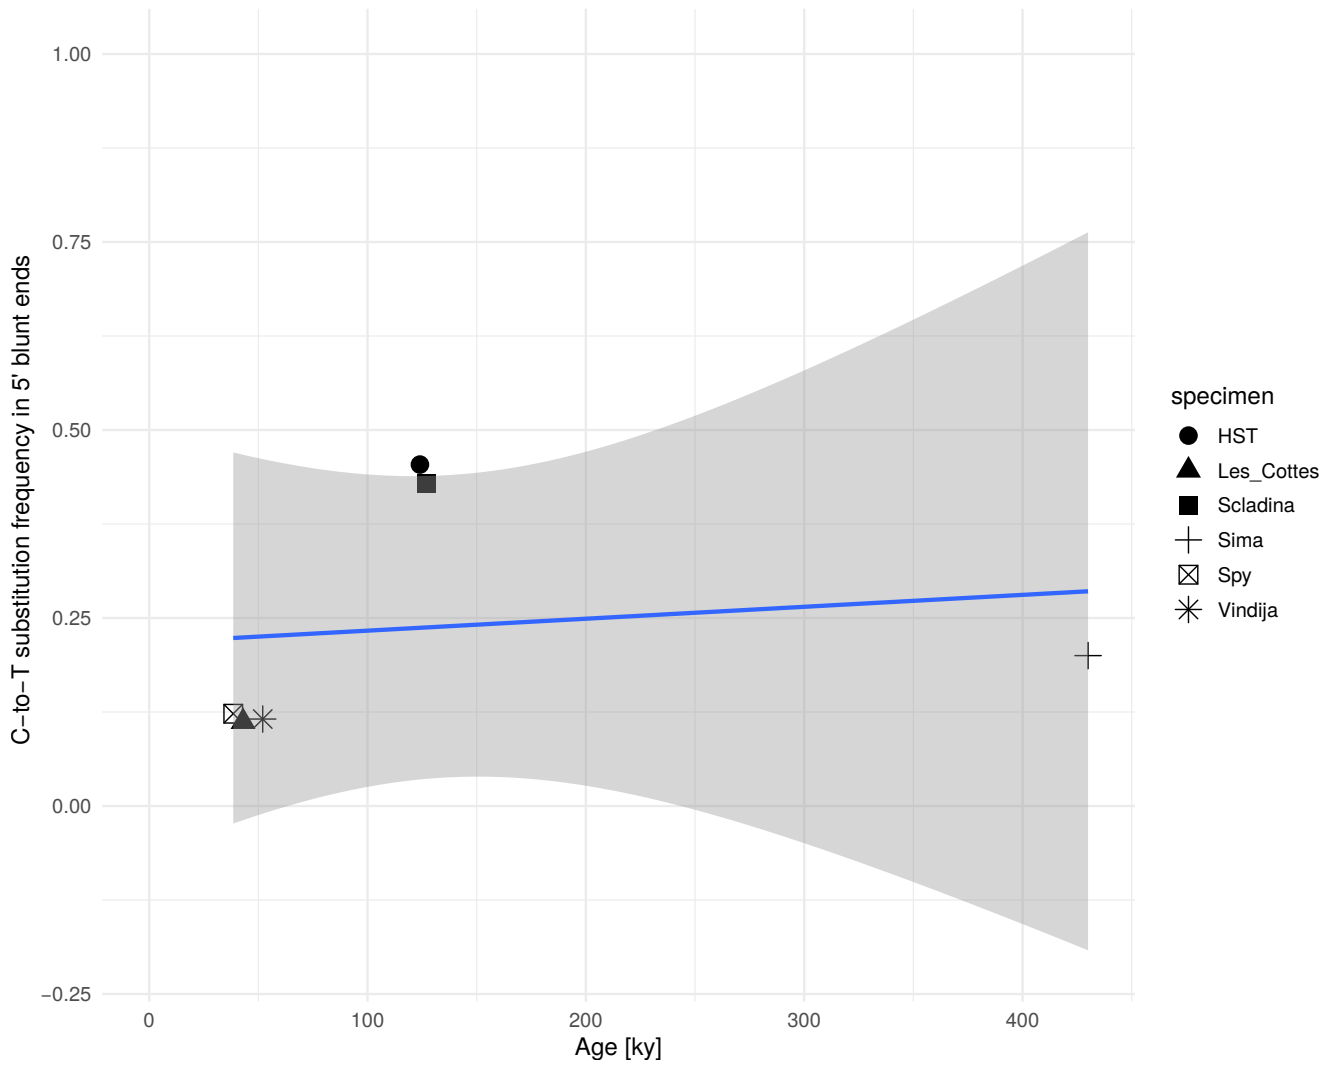

**Fig. S9.** C-to-T substitution frequency in 5' blunt ends vs. age in libraries from different Neanderthal specimens (N = 6). As some libraries show substantial levels of human DNA contamination, the analysis was restricted to putatively endogenous, deaminated fragments by requiring a C-to-T substitution at the 3' end of sequences. Background noise was subtracted using the signal/noise ratio determined via comparison to a modern control sample (see Table S1). For specimens for which more than one library were available, the library producing the largest number of DNA fragments with an inferred 1-nt 5' overhang was chosen. No significant correlation between deamination and sample age was found (one-tailed F-statistic linear regression on 1 and 4 degrees of freedom: 0.0896, p-value: 0.78 (R2: 0.0219)).

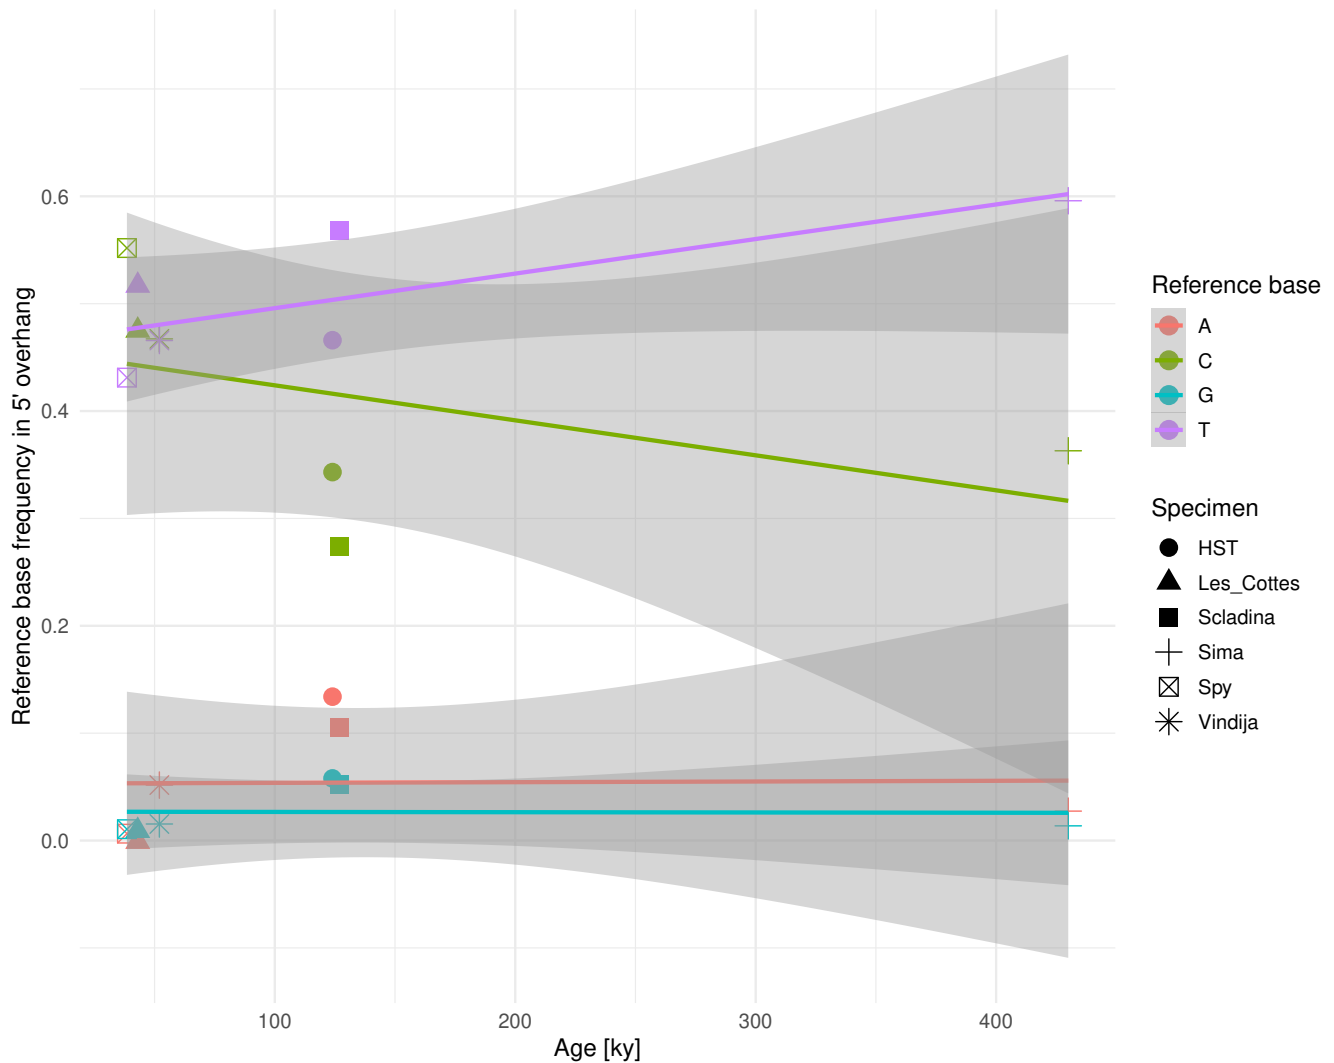

**Fig. S10.** Reference base composition in 1-nt 5' overhangs vs. age in libraries from different Neanderthal specimens (N = 6). As some libraries show substantial levels of human DNA contamination, the analysis was restricted to putatively endogenous, deaminated fragments by requiring a C-to-T substitution at the 3' end of sequences. Background noise was subtracted using the signal/noise ratio determined via comparison to a modern control sample (see Table S1). For specimens for which more than one library were available, the library producing the largest number of DNA fragments with an inferred 1-nt 5' overhang was chosen. No significant correlation between base composition and sample age was found (one-tailed F-statistic linear regression on 1 and 4 degrees of freedom, for "A":  $F = 0.0012$ , p-value: 0.97 (R2: 0.0003), for "C":  $F = 1.161$ , p-value: 0.34 (R2: 0.2249), for "G":  $F = 0.00108$ , p-value: 0.98 (R2: 0.00027), for "T":  $F = 4.979$ , p-value: 0.09 (R2: 0.5545)).

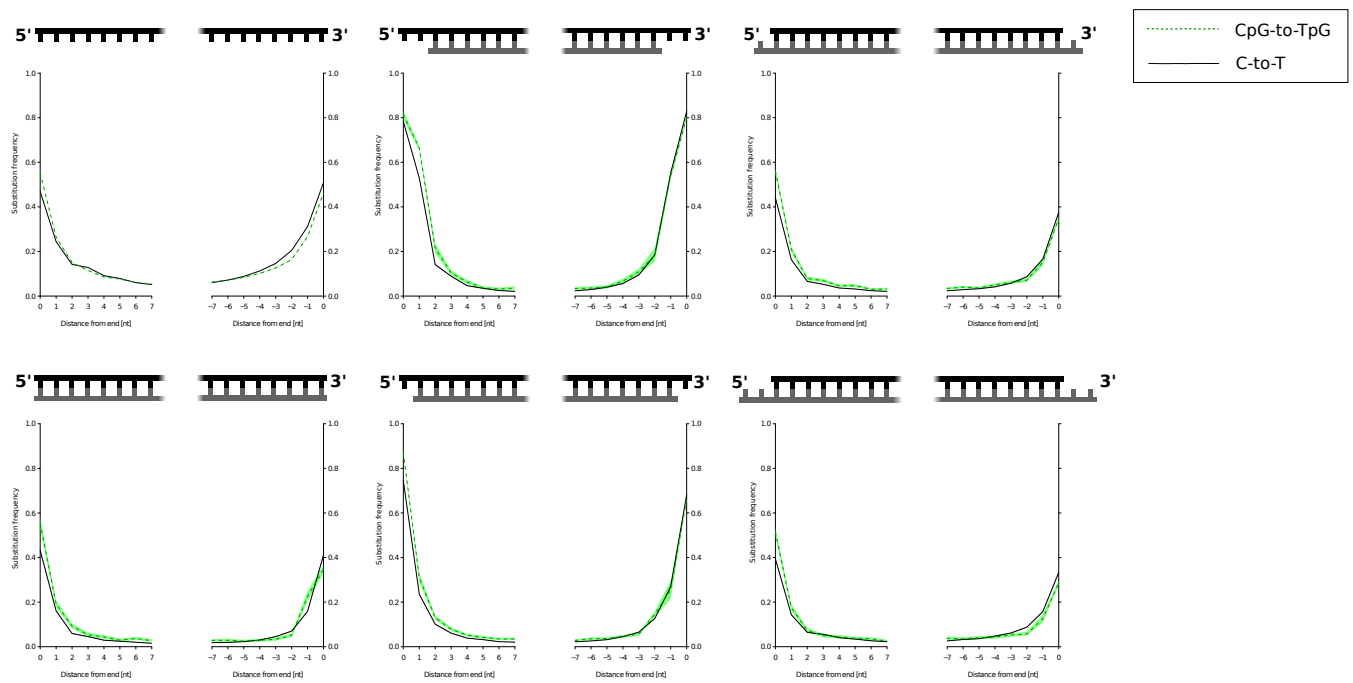

**Fig. S11.** Background corrected C-to-T (black line) and CpG-to-TpG (green dashed line) substitution frequencies in sequences combined from 5 Neanderthal specimens (Hohlenstein-Stadel, Les Cottés Z4-1514, Scladina I-4A, Spy 94a and Sima de los Huesos) in different structural contexts as indicated by schematic representations. 95% binomial confidence intervals are indicated by shadings around the lines.

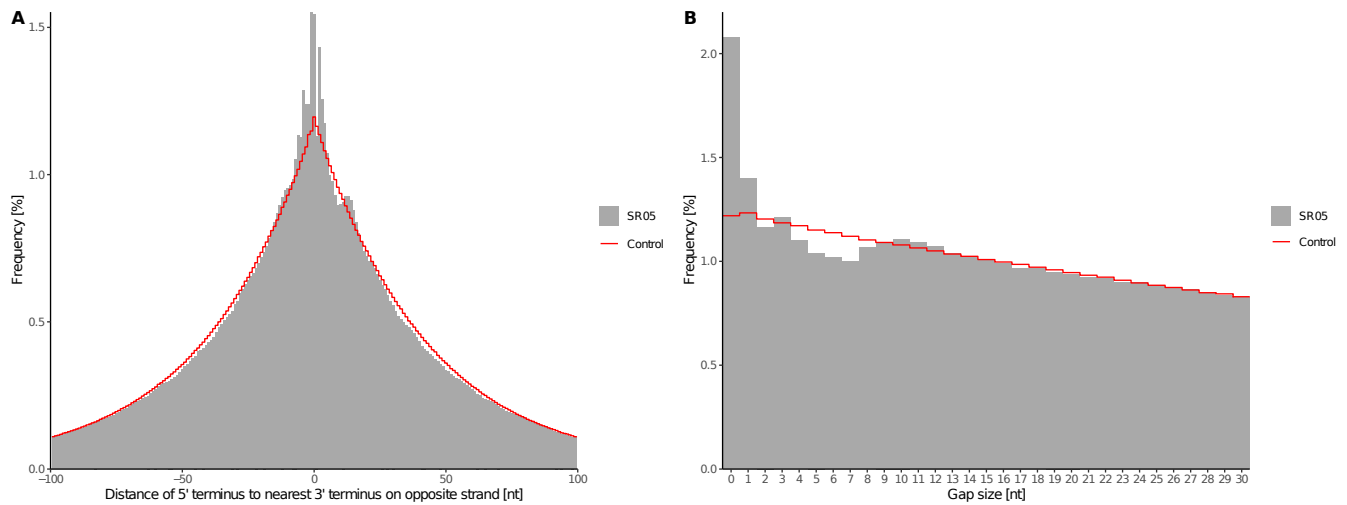

**Fig. S12.** Identification of sequences from DNA strands originating from the same double-stranded DNA molecules in a library constructed with the SRSly library preparation method from cfDNA isolated from blood plasma. (A) Distribution of distances between the 5' end of each sequence to the nearest 3' end on the opposing strand. (B) Distribution of distances between sequence alignments on the same strand. Data from the cfDNA library (SR-05) are shown in grey bars. The red line shows the same analysis performed for an equal number of control sequences obtained from shallow sequences of artificially fragmented modern human DNA where sequences should be distributed randomly across the reference genome.

## Overall base frequencies

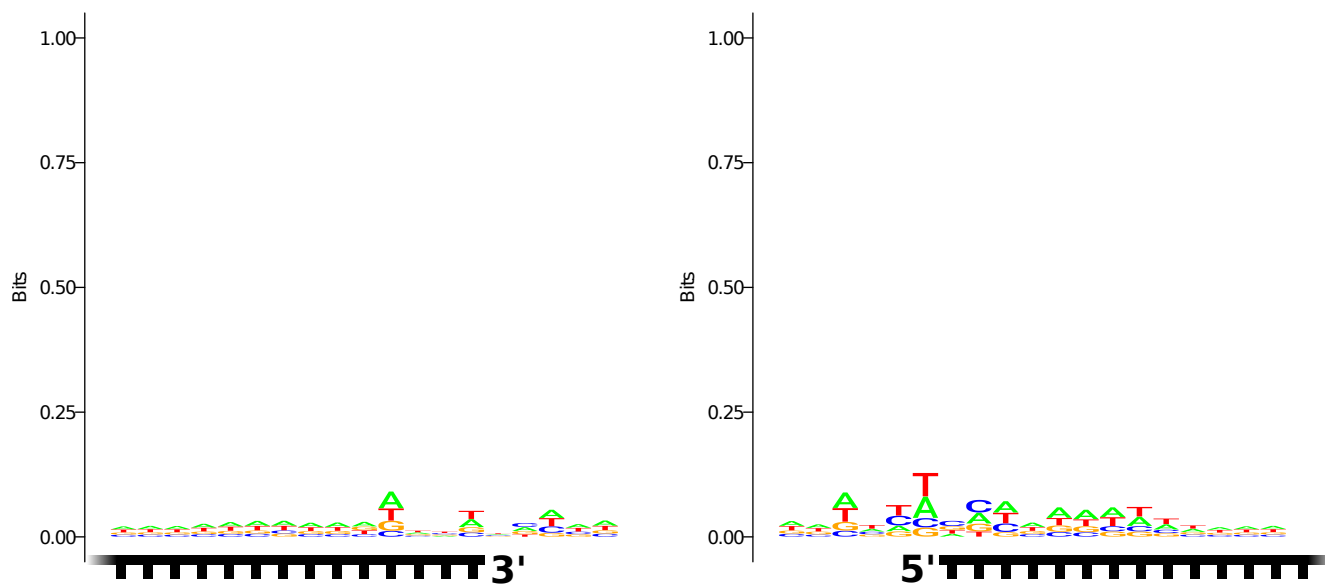

## Base frequencies in nicked structure

Raw data

Normalized

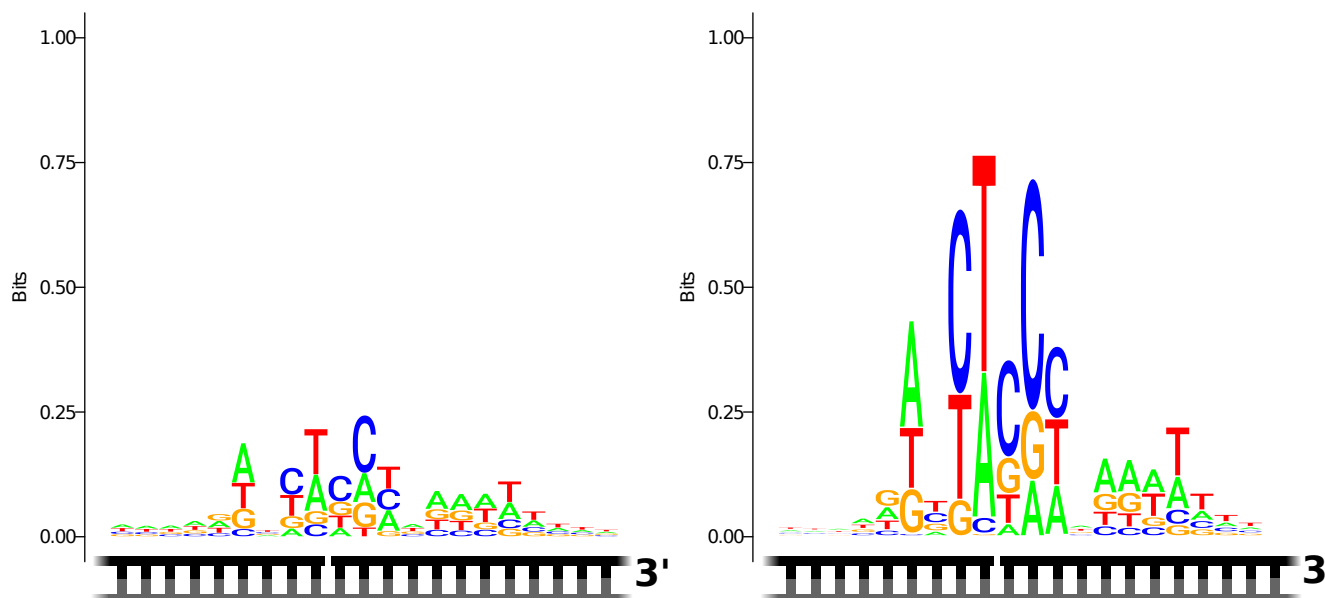

**Fig. S13.** Sequence logo plots of the reference base composition around molecule ends of a library constructed with the SRSly library preparation protocol from cDNA isolated from blood plasma. The base composition was computed for all DNA ends regardless of molecule structure (top) as well those ends that were inferred to be located in nicks, with and without background correction (bottom). A schematic representation of the alignments shows the strand used for calculating reference base composition (marked in black) and a second complementary strand of unknown length that was putatively present (marked in grey).

Table S1: Sequencing summary statistics for the Vindija 33.19 Neanderthal DNA library.

| Description               | Library ID         | # Library molecules (qPCR) | # Sequences generated | # Sequences $\geq$ 35bp | # Sequences $\geq$ 35bp mapped to hg19 with mapping quality $\geq$ 25 | % Sequences mapping to hg19 | # Unique sequences mapping to hg19 | Average sequence duplicates | Estimated number of hominin molecules in library |
|---------------------------|--------------------|----------------------------|-----------------------|-------------------------|-----------------------------------------------------------------------|-----------------------------|------------------------------------|-----------------------------|--------------------------------------------------|
| Library negative control  | A18943             | 1.74E+08                   | 1.82E+05              | 1,409                   | 4                                                                     | 0.28                        | 4                                  | 1                           | 3,816                                            |
| Vindija 33.19             | A18947             | 5.56E+08                   | 2.62E+06              | 111,764                 | 7,387                                                                 | 6.61                        | 7,319                              | 1.01                        | 1,571,115                                        |
| Vindija 33.19 gel-excised | A18947 gel-excised | See above                  | 2.35E+08              | 110,788,805             | 7,150,036                                                             | 6.45                        | 2,722,670                          | 2.63                        | See above                                        |

Table S2: Number of sequences inferred to be located in a 1-nt 5'-overhang in sequence data from different Neanderthal specimens, as well as in the control data set down-sampled to an equal number of aligned sequences.

| Specimen                   | Site                              | Library ID * | Genomic coverage generated [-fold] | Structural context | Sequences identified in sample DNA dataset | Sequences identified in down-sampled control dataset | Signal/noise ratio |
|----------------------------|-----------------------------------|--------------|------------------------------------|--------------------|--------------------------------------------|------------------------------------------------------|--------------------|
| Vindija 33.19 [this study] | Vindija cave, Croatia             | A18947       | 0.0451                             | 2-nt 5' overhang   | 14,450                                     | 1,379                                                | 10.5               |
|                            |                                   |              | 0.0451                             | 1-nt 5' overhang   | 24,003                                     | 1,415                                                | 17.0               |
|                            |                                   |              | 0.0451                             | blunt              | 19,955                                     | 1,421                                                | 14.0               |
|                            |                                   |              | 0.0451                             | 1-nt 3' overhang   | 19,227                                     | 1,464                                                | 13.1               |
|                            |                                   |              | 0.0451                             | 2-nt 3' overhang   | 11,920                                     | 1,344                                                | 8.9                |
| Goyet Q56-1                | Troisième caverne, Goyet, Belgium | A9122        | 0.8146                             | 1-nt 5' overhang   | 428,764                                    | 307,022                                              | 1.4                |
|                            |                                   | A9229        | 0.5711                             | 1-nt 5' overhang   | 153,879                                    | 123,256                                              | 1.2                |
|                            |                                   | A9349        | 0.4978                             | 1-nt 5' overhang   | 133,589                                    | 96,080                                               | 1.4                |
| HST                        | Hohlenstein-Stadel cave, Germany  | F7016        | 0.0175                             | 1-nt 5' overhang   | 8,220                                      | 230                                                  | 35.7               |
|                            |                                   | F7017        | 0.0149                             | 1-nt 5' overhang   | 6,043                                      | 168                                                  | 36.0               |
|                            |                                   | L5262        | 0.0001                             | 1-nt 5' overhang   | 0                                          | 0                                                    | 0.0                |
|                            |                                   | L5263        | 0.0004                             | 1-nt 5' overhang   | 1                                          | 0                                                    | 0.0                |
|                            |                                   | L5264        | 0.0026                             | 1-nt 5' overhang   | 253                                        | 8                                                    | 31.6               |
|                            |                                   | L5265        | 0.0014                             | 1-nt 5' overhang   | 13                                         | 1                                                    | 13.0               |
|                            |                                   | L5386        | 0.0230                             | 1-nt 5' overhang   | 11413                                      | 446                                                  | 25.6               |
|                            |                                   | R5784        | 0.0015                             | 1-nt 5' overhang   | 27                                         | 2                                                    | 13.5               |
|                            |                                   | R5785        | 0.0022                             | 1-nt 5' overhang   | 43                                         | 4                                                    | 10.8               |
| Les Cottés Z4-1514         | Les Cottés cave, France           | A9230        | 0.6391                             | 1-nt 5' overhang   | 891,212                                    | 273,635                                              | 3.3                |
|                            |                                   | A9290        | 0.1838                             | 1-nt 5' overhang   | 71,577                                     | 22,633                                               | 3.2                |
|                            |                                   | A9291        | 0.1037                             | 1-nt 5' overhang   | 21,048                                     | 6,740                                                | 3.1                |
|                            |                                   | A9309        | 0.1578                             | 1-nt 5' overhang   | 114,227                                    | 14,832                                               | 7.7                |
|                            |                                   | A9350        | 0.4385                             | 1-nt 5' overhang   | 436,137                                    | 132,255                                              | 3.3                |
|                            |                                   | A9393        | 0.1890                             | 1-nt 5' overhang   | 160,481                                    | 20,947                                               | 7.7                |
|                            |                                   | A9394        | 0.1796                             | 1-nt 5' overhang   | 143,471                                    | 18,777                                               | 7.6                |
|                            |                                   | A9395        | 0.1907                             | 1-nt 5' overhang   | 162,701                                    | 21,121                                               | 7.7                |
|                            |                                   | A9420        | 0.1923                             | 1-nt 5' overhang   | 174,883                                    | 21,747                                               | 8.0                |
| Mezmaiskaya 1              | Mezmaiskaya cave, Russia          | R5661        | 0.6474                             | 1-nt 5' overhang   | 266,177                                    | 310,727                                              | 0.9                |
|                            |                                   | R5662        | 0.5521                             | 1-nt 5' overhang   | 196,729                                    | 228,286                                              | 0.9                |
| Mezmaiskaya 2              | Mezmaiskaya cave, Russia          | A9180        | 0.7403                             | 1-nt 5' overhang   | 646,943                                    | 346,152                                              | 1.9                |
|                            |                                   | A9288        | 0.3415                             | 1-nt 5' overhang   | 129,027                                    | 71,157                                               | 1.8                |
|                            |                                   | A9289        | 0.3196                             | 1-nt 5' overhang   | 111,579                                    | 62,405                                               | 1.8                |
| Scladina I-4A              | Scladina cave, Belgium            | F7490        | 0.0069                             | 1-nt 5' overhang   | 1,097                                      | 23                                                   | 47.7               |
|                            |                                   | G2159        | 0.0073                             | 1-nt 5' overhang   | 1,135                                      | 26                                                   | 43.7               |
|                            |                                   | G2160        | 0.0085                             | 1-nt 5' overhang   | 1,558                                      | 49                                                   | 31.8               |
|                            |                                   | G2161        | 0.0083                             | 1-nt 5' overhang   | 1,567                                      | 35                                                   | 44.8               |
| Sima de los Huesos         | Sima de los Huesos, Spain         | R1848        | 0.0037                             | 1-nt 5' overhang   | 1,821                                      | 8                                                    | 227.6              |
| Spy 94a                    | Spy cave, Belgium                 | A9416        | 0.1567                             | 1-nt 5' overhang   | 48,298                                     | 18,234                                               | 2.6                |
|                            |                                   | A9417        | 0.1487                             | 1-nt 5' overhang   | 43,367                                     | 16,580                                               | 2.6                |
|                            |                                   | A9418        | 0.1576                             | 1-nt 5' overhang   | 48,525                                     | 18,687                                               | 2.6                |
|                            |                                   | A9419        | 0.1397                             | 1-nt 5' overhang   | 43,889                                     | 14,624                                               | 3.0                |
|                            |                                   | R5556        | 0.2134                             | 1-nt 5' overhang   | 91,996                                     | 33,796                                               | 2.7                |

\*Only libraries produced without uracil-DNA-glycosylase (UDG) treatment were investigated. Libraries highlighted in grey were chosen for further analyses.

Table S3: Nucleotide substitution frequencies at the 5' terminus (position 0) and the penultimate position (position 1) of sequences from Vindija 33.19 in different structural contexts. 95% binomial confidence intervals are provided in parentheses.

| Context  | 5p-blunt                       | 5p-blunt                  | 5p-overhang-1-nt          | 5p-overhang-1-nt          | 5p-overhang-2nt           | 5p-overhang-2nt           | 5p-overhang-2nt           | 5p-overhang-2nt           | 5p-recessed-1-nt          | 5p-recessed-1-nt          | 5p-recessed-2nt           | 5p-recessed-2nt           | 5p-all                    | 5p-all |
|----------|--------------------------------|---------------------------|---------------------------|---------------------------|---------------------------|---------------------------|---------------------------|---------------------------|---------------------------|---------------------------|---------------------------|---------------------------|---------------------------|--------|
| Position |                                | 1                         | 0                         | 1                         | 0                         | 1                         | 0                         | 1                         | 0                         | 1                         | 0                         | 1                         | 0                         | 1      |
| CT       | 0.2073<br>(0.1911-0.2243)      | 0.0852<br>(0.0762-0.095)  | 0.7113<br>(0.7028-0.7197) | 0.1381<br>(0.1257-0.1512) | 0.7781<br>(0.7673-0.7886) | 0.6399<br>(0.6281-0.6517) | 0.0689<br>(0.0578-0.0814) | 0.1924<br>(0.1782-0.2072) | 0.082<br>(0.0731-0.0916)  | 0.1953<br>(0.1786-0.2128) | 0.0775<br>(0.0665-0.0896) | 0.4573<br>(0.4561-0.4585) | 0.277<br>(0.2758-0.2782)  |        |
| AC       | 0.0007<br>(0.0002-0.0016)      | 0.0003<br>(0-0.0012)      | 0.0016<br>(0.0002-0.0057) | 0.0004<br>(0.0001-0.0009) | 0.0005<br>(0-0.0026)      | 0.0024<br>(0.0007-0.0062) | 0.0727<br>(0.0202-0.1759) | 0.0009<br>(0.0003-0.0024) | 0.001<br>(0.0004-0.0022)  | 0.0009<br>(0.0006-0.004)  | 0.0017<br>(0-0.0015)      | 0.0003<br>(0.0012-0.0013) | 0.0006<br>(0.0006-0.0007) |        |
| AG       | 0.002<br>(0.0011-0.0033)       | 0.0028<br>(0.0016-0.0045) | 0.0016<br>(0.0002-0.0057) | 0.0036<br>(0.0026-0.0049) | 0.0078<br>(0.0046-0.0125) | 0.0066<br>(0.0033-0.0118) | 0.0005<br>(0.0001-0.0015) | 0.0019<br>(0.0008-0.0037) | 0.002<br>(0.001-0.0035)   | 0.0014<br>(0.0004-0.0035) | 0.0016<br>(0.0006-0.0035) | 0.0026<br>(0.0025-0.0028) | 0.0031<br>(0.003-0.0032)  |        |
| AT       | 0.0019<br>(0.001-0.0031)       | 0.0011<br>(0.0005-0.0024) | 0.0111<br>(0.0061-0.0186) | 0.0006<br>(0.0002-0.0012) | 0.0032<br>(0.0013-0.0066) | 0.0048<br>(0.0021-0.0095) | 0.0019<br>(0.0009-0.0033) | 0.0024<br>(0.0011-0.0043) | 0.0003<br>(0-0.0012)      | 0.0031<br>(0.0014-0.0058) | 0.0003<br>(0-0.0015)      | 0.0025<br>(0.0024-0.0026) | 0.0009<br>(0.0008-0.0009) |        |
| CA       | 0.0017<br>(0.0005-0.0043)      | 0.0026<br>(0.0012-0.0049) | 0.0003<br>(0.0001-0.0008) | 0.0014<br>(0.0004-0.0035) | 0.0005<br>(0.0001-0.0015) | 0.0005<br>(0.0001-0.0014) | 0.0011<br>(0-0.0012)      | 0.0003<br>(0-0.0019)      | 0.0009<br>(0.0002-0.0025) | 0.0009<br>(0-0.0017)      | 0.0003<br>(0-0.0017)      | 0.0011<br>(0.001-0.0012)  | 0.0014<br>(0.0013-0.0015) |        |
| CG       | 0.0086<br>(0-0.0016)           | 0.0019<br>(0.0008-0.0041) | 0.0004<br>(0.0001-0.0009) | 0.0027<br>(0-0.0019)      | 0.0067<br>(0-0.0009)      | 0.0011<br>(0-0.0006)      | 0.0019<br>(0.0001-0.0039) | 0.0025<br>(0-0.0019)      | 0.0017<br>(0-0.0016)      | 0.0039<br>(0.0003-0.0041) | 0.002<br>(0.0003-0.0041)  | 0.004<br>(0.0003-0.0003)  | 0.0024<br>(0.0005-0.0007) |        |
| GA       | 0.0045-0.015<br>(0.0045-0.015) | 0.0037<br>(0-0.0079)      | 0.0005<br>(0.0001-0.0016) | 0.0072<br>(0.0014-0.0047) | 0.0004<br>(0.0018-0.0172) | 0.0011<br>(0-0.0061)      | 0.0013<br>(0.0003-0.0037) | 0.0025<br>(0.0008-0.0059) | 0.0016<br>(0.0007-0.0035) | 0.0016<br>(0.0013-0.0091) | 0.0016<br>(0.0006-0.0046) | 0.0022<br>(0.0038-0.0043) | 0.0004<br>(0.0023-0.0026) |        |
| GC       | 0.0005<br>(0.0002-0.0013)      | 0.0009<br>(0.0003-0.0024) | 0.0037<br>(0.0119-0.0419) | 0.0011<br>(0.0004-0.0026) | 0.0118<br>(0.0048-0.0241) | 0.0011<br>(0-0.0061)      | 0.0013<br>(0.0003-0.0037) | 0.003<br>(0.0011-0.0066)  | 0.001<br>(0.0003-0.0025)  | 0.0039<br>(0.0013-0.0091) | 0.0014<br>(0-0.0014)      | 0.0045<br>(0.0043-0.0048) | 0.0009<br>(0.0008-0.001)  |        |
| GT       | 0.0005<br>(0.0001-0.0012)      | 0.0012<br>(0.0005-0.0024) | 0.0003<br>(0.0001-0.0008) | 0.0021<br>(0.0011-0.0036) | 0.0002<br>(0-0.0006)      | 0.0002<br>(0-0.001)       | 0.0003<br>(0.0003-0.0037) | 0.0002<br>(0-0.0007)      | 0.0004<br>(0.0006-0.0028) | 0.0002<br>(0-0.001)       | 0.0002<br>(0-0.001)       | 0.0007<br>(0.0007-0.0008) | 0.0011<br>(0.001-0.0012)  |        |
| TA       | 0.0008<br>(0.0003-0.0017)      | 0.0005<br>(0.0001-0.0017) | 0.0017<br>(0.001-0.0027)  | 0.0009<br>(0.0008-0.0032) | 0.0009<br>(0.0003-0.002)  | 0.0004<br>(0-0.0013)      | 0.0005<br>(0.0001-0.0017) | 0.0008<br>(0.0003-0.0016) | 0.0014<br>(0.0004-0.0023) | 0.0014<br>(0.0006-0.0028) | 0.0014<br>(0.0005-0.0033) | 0.0012<br>(0.0011-0.0012) | 0.0014<br>(0.0011-0.0013) |        |
| TC       | 0.0003<br>(0.0001-0.001)       | 0.0017<br>(0-0.0006)      | 0.0003<br>(0-0.0003)      | 0.0002<br>(0-0.0012)      | 0.0002<br>(0-0.0006)      | 0.0007<br>(0-0.0007)      | 0.0007<br>(0.0001-0.002)  | 0.0001<br>(0-0.0006)      | 0.0001<br>(0-0.001)       | 0.0002<br>(0-0.001)       | 0.0002<br>(0-0.001)       | 0.0002<br>(0.0002-0.0003) | 0.0005<br>(0.0005-0.0006) |        |
| TG       | 0.236<br>(0.1524-0.3378)       | 0.0417<br>(0.0154-0.0885) | 0.8038<br>(0.769-0.8355)  | 0.1899<br>(0.1103-0.2938) | 0.8235<br>(0.6913-0.916)  | 0.7661<br>(0.6424-0.7644) | 0.0005<br>(0.0001-0.0017) | 0.219<br>(0.1442-0.3103)  | 0.0526<br>(0.0196-0.111)  | 0.25<br>(0.1554-0.366)    | 0.0732<br>(0.0273-0.1525) | 0.4982<br>(0.4917-0.5048) | 0.258<br>(0.2513-0.2649)  |        |

Table S4: Nucleotide substitution frequencies at the 3' terminus (position 0) and the penultimate position (position -1) of sequences from Vindija 33.19 in different structural contexts. 95% binomial confidence intervals are provided in parentheses.

| Context  | 3p-blunt                  | 3p-blunt                  | 3p-overhang-1-nt          | 3p-overhang-1-nt          | 3p-overhang-2nt           | 3p-overhang-2nt           | 3p-overhang-2nt           | 3p-overhang-2nt           | 3p-recessed-1-nt          | 3p-recessed-1-nt          | 3p-recessed-2nt           | 3p-recessed-2nt           | 3p-all                    | 3p-all |
|----------|---------------------------|---------------------------|---------------------------|---------------------------|---------------------------|---------------------------|---------------------------|---------------------------|---------------------------|---------------------------|---------------------------|---------------------------|---------------------------|--------|
| Position |                           | -1                        | 0                         | -1                        | 0                         | -2                        | -1                        | 0                         | -1                        | 0                         | -1                        | 0                         | -1                        | 0      |
| CT       | 0.0414<br>(0.0356-0.0478) | 0.1281<br>(0.1111-0.1467) | 0.0746<br>(0.0634-0.087)  | 0.6015<br>(0.5905-0.6124) | 0.0571<br>(0.045-0.0713)  | 0.4913<br>(0.4779-0.5048) | 0.6322<br>(0.6149-0.6493) | 0.0277<br>(0.0232-0.0328) | 0.0961<br>(0.0876-0.1051) | 0.0399<br>(0.033-0.0478)  | 0.0911<br>(0.0798-0.1034) | 0.19<br>(0.189-0.191)     | 0.3386<br>(0.3373-0.3399) |        |
| AC       | 0.0003<br>(0-0.0012)      | 0.0006<br>(0.0002-0.0013) | 0.0003<br>(0.0001-0.0009) | 0.001<br>(0.0001-0.0036)  | 0.1176<br>(0.0146-0.3644) | 0.0041<br>(0.0018-0.0081) | 0.0004<br>(0-0.0021)      | 0.0004<br>(0.0001-0.0011) | 0.0004<br>(0.0002-0.0018) | 0.0007<br>(0-0.0007)      | 0.0002<br>(0.0001-0.002)  | 0.0005<br>(0.0004-0.0005) | 0.0006<br>(0.0005-0.0006) |        |
| AG       | 0.003<br>(0.0018-0.0047)  | 0.002<br>(0.001-0.0031)   | 0.0016<br>(0.0009-0.0026) | 0.003<br>(0.0011-0.0064)  | 0.0002<br>(0-0.001)       | 0.0046<br>(0.0021-0.0088) | 0.0035<br>(0.0016-0.0066) | 0.0016<br>(0.0009-0.0028) | 0.0029<br>(0.0017-0.0047) | 0.0012<br>(0.0004-0.0027) | 0.002<br>(0.0014-0.0049)  | 0.0023<br>(0.0022-0.0024) | 0.0022<br>(0.0021-0.0023) |        |
| AT       | 0.0005<br>(0.0001-0.0014) | 0.0011<br>(0.0006-0.0021) | 0.0003<br>(0.0001-0.0009) | 0.0054<br>(0.0027-0.0097) | 0.0018<br>(0.0009-0.0033) | 0.001<br>(0.0001-0.0037)  | 0.0027<br>(0.0011-0.0055) | 0.0006<br>(0.0002-0.0014) | 0.0006<br>(0.0012-0.0038) | 0.0002<br>(0-0.0011)      | 0.0002<br>(0.0001-0.002)  | 0.0007<br>(0.0007-0.0008) | 0.0015<br>(0.0014-0.0016) |        |
| CA       | 0.0012<br>(0.0004-0.0027) | 0.002<br>(0.0012-0.003)   | 0.0005<br>(0.0005-0.0052) | 0.0002<br>(0.0001-0.0013) | 0.0004<br>(0-0.0007)      | 0.0031<br>(0.0003-0.0022) | 0.0002<br>(0.0001-0.0023) | 0.0002<br>(0.0001-0.0018) | 0.0002<br>(0.0001-0.002)  | 0.0004<br>(0-0.002)       | 0.0004<br>(0.0005-0.0043) | 0.0005<br>(0.001-0.0012)  | 0.0005<br>(0.0013-0.0015) |        |
| CG       | 0.0005<br>(0.0001-0.0017) | 0.0021<br>(0.0004-0.0062) | 0.001<br>(0.0001-0.0036)  | 0.0004<br>(0.0001-0.0011) | 0.0031<br>(0.0009-0.008)  | 0.0002<br>(0-0.0007)      | 0.0002<br>(0-0.0012)      | 0.0002<br>(0-0.0012)      | 0.0002<br>(0-0.0012)      | 0.0002<br>(0-0.002)       | 0.0004<br>(0-0.0016)      | 0.0005<br>(0.0005-0.0006) | 0.0006<br>(0.0004-0.0006) |        |
| GA       | 0.0011<br>(0.0003-0.0029) | 0.006<br>(0.0033-0.01)    | 0.0055<br>(0.0031-0.0089) | 0.0071<br>(0.0029-0.0145) | 0.0059<br>(0-0.0029)      | 0.0027<br>(0.0022-0.0127) | 0.006<br>(0.0019-0.0138)  | 0.0042<br>(0.0014-0.0046) | 0.0027<br>(0.0021-0.0072) | 0.0042<br>(0.0027-0.0082) | 0.0027<br>(0.0009-0.0062) | 0.0034<br>(0.0034-0.0033) | 0.0045<br>(0.0043-0.0048) |        |
| GC       | 0.0005<br>(0.0005-0.0033) | 0.0013<br>(0.0003-0.0037) | 0.0003<br>(0-0.0019)      | 0.0003<br>(0.0002-0.0073) | 0.0033<br>(0.0013-0.0068) | 0.002<br>(0.0002-0.007)   | 0.0009<br>(0-0.0044)      | 0.0009<br>(0.0002-0.0023) | 0.0009<br>(0.0001-0.0025) | 0.0003<br>(0-0.0019)      | 0.0003<br>(0.0001-0.0039) | 0.0009<br>(0.0008-0.001)  | 0.0011<br>(0.0009-0.0011) |        |
| GT       | 0.0026<br>(0.0012-0.0049) | 0.0038<br>(0.0018-0.0073) | 0.0017<br>(0.0006-0.004)  | 0.0152<br>(0.0085-0.0249) | 0.0009<br>(0.0001-0.0034) | 0.0059<br>(0.0022-0.0127) | 0.006<br>(0.0019-0.0138)  | 0.002<br>(0.0009-0.0038)  | 0.001<br>(0.0002-0.003)   | 0.0003<br>(0-0.0019)      | 0.0003<br>(0-0.003)       | 0.0005<br>(0.0011-0.0013) | 0.0023<br>(0.0022-0.0025) |        |
| TA       | 0.0016<br>(0.0008-0.003)  | 0.0008<br>(0.0003-0.0017) | 0.0005<br>(0.0005-0.0031) | 0.0014<br>(0.0001-0.0012) | 0.0005<br>(0.0005-0.0048) | 0.0019<br>(0.0006-0.0036) | 0.0017<br>(0.0005-0.0027) | 0.0003<br>(0.0002-0.0018) | 0.0003<br>(0.0001-0.0008) | 0.0003<br>(0-0.001)       | 0.0003<br>(0-0.0009)      | 0.0011<br>(0.001-0.0012)  | 0.0008<br>(0.0007-0.0008) |        |
| TC       | 0.0028<br>(0.0016-0.0044) | 0.0016<br>(0.0008-0.0028) | 0.0005<br>(0.0001-0.0017) | 0.0005<br>(0.0004-0.0019) | 0.0005<br>(0.0004-0.0035) | 0.0014<br>(0.0011-0.0047) | 0.0025<br>(0.001-0.0036)  | 0.0002<br>(0.0001-0.0013) | 0.0023<br>(0.0015-0.0034) | 0.0013<br>(0.0004-0.003)  | 0.0013<br>(0.001-0.0035)  | 0.002<br>(0.0014-0.0016)  | 0.0018<br>(0.0017-0.0018) |        |
| TG       | 0.0007<br>(0.0002-0.0017) | 0.0003<br>(0-0.001)       | 0.0009<br>(0.0003-0.0024) | 0.0007<br>(0-0.0008)      | 0.0007<br>(0.0001-0.0024) | 0.0006<br>(0.0001-0.002)  | 0.0006<br>(0-0.001)       | 0.0009<br>(0.0003-0.002)  | 0.0009<br>(0.0002-0.0012) | 0.0009<br>(0-0.001)       | 0.0015<br>(0.0007-0.0029) | 0.0005<br>(0.0006-0.0007) | 0.0005<br>(0.0005-0.0006) |        |
| CG TG    | 0.0745<br>(0.0305-0.1474) | 0.1681<br>(0.1058-0.2476) | 0.1429<br>(0.0403-0.3267) | 0.6831<br>(0.6518-0.7132) | 0.0014<br>(0.0004-0.0035) | 0.3288<br>(0.2233-0.4487) | 0.6877<br>(0.6335-0.7383) | 0.0417<br>(0.0087-0.117)  | 0.0995<br>(0.0764-0.1267) | 0.0727<br>(0.0202-0.1759) | 0.114<br>(0.0759-0.1626)  | 0.153<br>(0.1468-0.1595)  | 0.3834<br>(0.3793-0.3874) |        |

Table S5: Number of sequences inferred to be located in different contexts in previously published sequence data from cfDNA isolated from blood plasma (Troll et al. 2019), as well as in the control data down-sampled to an equal number of aligned sequences.

| Specimen         | Sample type                                              | Library ID | Genomic coverage generated [-fold] | Structural context | Sequences identified in sample DNA dataset | Sequences identified in down-sampled control dataset | Signal/noise ratio |
|------------------|----------------------------------------------------------|------------|------------------------------------|--------------------|--------------------------------------------|------------------------------------------------------|--------------------|
| H-69             | Cell-free DNA isolated from blood plasma (healthy donor) | SR-05      | 3.4                                | 6-nt 3' overhang   | 752,682                                    | 682,360                                              | 1.10               |
|                  |                                                          |            |                                    | 5-nt 3' overhang   | 748,044                                    | 699,186                                              | 1.07               |
|                  |                                                          |            |                                    | 4-nt 3' overhang   | 854,355                                    | 715,714                                              | 1.19               |
|                  |                                                          |            |                                    | 3-nt 3' overhang   | 823,298                                    | 733,351                                              | 1.12               |
|                  |                                                          |            |                                    | 2-nt 3' overhang   | 761,151                                    | 824,024                                              | 1.08               |
|                  |                                                          |            |                                    | 1-nt 3' overhang   | 769,410                                    | 1,031,929                                            | 1.34               |
|                  |                                                          |            |                                    | blunt              | 804,415                                    | 1,027,061                                            | 1.28               |
|                  |                                                          |            |                                    | 1-nt 5' overhang   | 781,887                                    | 751,980                                              | 0.96               |
| 2-nt 5' overhang | 763,106                                                  | 952,686    | 1.25                               |                    |                                            |                                                      |                    |
